# Supplementary material for: Effect of combined application of inorganic nitrogen and phosphorus to an organic-matter poor soil on soil organic matter cycling
Source: PeerJ. 2024 Sep 5;12:e17984. doi: 10.7717/peerj.17984 (PMC11380837; doi:10.7717/peerj.17984)
Supplement: Supplemental Information 1 [file peerj-12-17984-s001.xlsx]

## Sheet: MBC
MBC						Non Fum C
Sr #	Sample		Fe(NH4)SO4 (blanks-sample)	Fresh soil	Dry soil in 5g fresh soil	DOC	Avg DOC	SE		Fe(NH4)SO4 (blanks-sample)	Fresh soil	Dry soil/5gm	C-fum (mg/kg soil)	MBC mg/kg soil (=(Fum C- Non Fum C)KE	Treatments	Avg MBC	SE	Blanks NF		S.E
1	Control	10.75	1.39	5	4.22297	162.93	159.741	1.77292	9.55	2.59	5	4.22297	303.589	401.883	Control	473.809	36.0751	12.15		36.0751
2	Control	10.8	1.34	5	4.23012	156.804			9.29	2.85	5	4.23012	333.501	504.849				11.89
3	Control	10.75	1.39	5	4.31406	159.49			9.18	2.96	5	4.31406	339.633	514.695				12.38
4	N	10.87	1.27	5	4.31034	145.847	156.532	13.2207	9.05	3.09	5	4.31034	354.856	597.168	N	576.665	32.7107			32.7107
5	N	10.53	1.61	5	4.3592	182.82			8.95	3.19	5	4.3592	362.234	512.611
6	N	10.9	1.24	5	4.3554	140.928			8.99	3.15	5	4.3554	358.004	620.215
7	P	10.79	1.35	5	4.32152	154.633	166.528	10.1201	8.54	3.6	5	4.32152	412.355	736.348	P	725.958	5.22456			5.22456
8	P	10.47	1.67	5	4.4287	186.658			8.21	3.93	5	4.4287	439.26	721.721
9	P	10.72	1.42	5	4.4405	158.293			8.46	3.68	5	4.4405	410.224	719.804
10	L	10.82	1.32	5	4.3554	150.021	165.419	7.86579	8.45	3.69	5	4.3554	419.376	769.586	L	757.035	115.549			115.549
11	L	10.58	1.56	5	4.38982	175.907			8.87	3.27	5	4.38982	368.728	550.918
12	L	10.64	1.5	5	4.3592	170.329			7.71	4.43	5	4.3592	503.04	950.601
13	NL	10.52	1.62	5	4.35161	184.277	174.039	17.3102	7.01	5.13	5	4.35161	583.543	1140.76	NL	1153.07	11.6335			11.6335
14	NL	10.91	1.23	5	4.34028	140.279			7.3	4.84	5	4.34028	551.992	1176.32
15	NL	10.43	1.71	5	4.28449	197.561			6.97	5.17	5	4.28449	597.306	1142.13
16	PL	10.38	1.76	5	4.32152	201.596	213.655	10.4368	8.62	3.52	5	4.32152	403.191	575.988	PL	541.558	85.8888			85.8888
17	PL	10.34	1.8	5	4.34783	204.93			8.28	3.86	5	4.34783	439.461	670.089
18	PL	10.07	2.07	5	4.37063	234.44			8.9	3.24	5	4.37063	366.949	378.599
19	NP	10.59	1.55	5	4.39367	174.626	172.373	2.25324	8.61	3.53	5	4.39367	397.697	637.345	NP	651.83	14.4851			14.4851
20	NP			5							5
21	NP	10.63	1.51	5	4.39367	170.12			8.56	3.58	5	4.39367	403.33	666.315
22	NPL	10.29	1.85	5	4.33651	211.172	172.682	25.5917	7.54	4.6	5	4.33651	525.076	896.869	NPL	975.264	48.7735			48.7735
23	NPL	11.02	1.12	5	4.46309	124.219			7.66	4.48	5	4.46309	496.875	1064.73
24	NPL	10.5	1.64	5	4.44444	182.655			7.47	4.67	5	4.44444	520.121	964.189

## Sheet: WEOC
	extractable organic carbon (WEOC)
Sample ID		MEANFerrous ammonium sulphate for blank (mL)	Ferrous ammonium sulphate for sample (mL)	Wt of moist soil sample (g)	Moisture content (%)	Wt of soil on oven dry basis (g)	Total volume (mL)	Volume of sample for analysis (mL)	WEOC (mg/mL)	WEOC (mg/L)	WEOC (mg C/kg soil)	Treatment	mean WEOC		S.E		blank
1	control	12.07	10.59	5	15.5405	4.32749	25	4	0.00091575	0.91575	543.263	Control	511.5		32.1625		12.21
2	control		10.85	5	15.3976	4.33284	25	4	0.000754875	0.754875	447.177	Control					12
3	Control		10.56	5	13.7187	4.39681	25	4	0.000934312	0.934312	544.062	Control					12
4	N		11.02	5	13.7931	4.39394	25	4	0.000649688	0.649688	378.611	N	386.883		4.24183
5	N		10.97	5	12.816	4.43199	25	4	0.000680625	0.680625	392.65	N
6	N		10.98	5	12.892	4.42901	25	4	0.000674437	0.674437	389.388	N
7	P		10.55	5	13.5696	4.40259	25	4	0.0009405	0.9405	546.823	P	555.873		8.08196
8	P		10.51	5	11.426	4.48728	25	4	0.00096525	0.96525	548.799	P
9	P		10.44	5	11.1901	4.49681	25	4	0.00100856	1.00856	571.996	P
10	L		9.81	5	12.892	4.42901	25	4	0.00139837	1.39837	807.354	L	902.535		50.9467
11	L		9.48	5	12.2037	4.45618	25	4	0.00160256	1.60256	918.624	L
12	L		9.32	5	12.816	4.43199	25	4	0.00170156	1.70156	981.625	L
13	NL		10.07	5	12.9678	4.42604	25	4	0.0012375	1.2375	715.036	NL	637.208		38.9141
14	NL		10.4	5	13.1944	4.41718	25	4	0.00103331	1.03331	598.46	NL
15	NL		10.42	5	14.3102	4.37406	25	4	0.00102094	1.02094	598.128	NL
16	PL		9.28	5	13.5696	4.40259	25	4	0.00172631	1.72631	1003.71	PL	702.301		153.019
17	PL		10.4	5	13.0435	4.42308	25	4	0.00103331	1.03331	597.524	PL
18	PL		10.65	5	12.5874	4.44099	25	4	0.000878625	0.878625	505.67	PL
19	NP		10.08	5	12.1265	4.45925	25	4	0.00123131	1.23131	705.246	NP	676.894		14.1758
20	NP											NP
21	NP		10.16	5	12.1265	4.45925	25	4	0.00118181	1.18181	676.894	NP
22	NPL		10.27	5	13.2697	4.41424	25	4	0.00111375	1.11375	645.55	NPL	650.609		4.81921
23	NPL		10.24	5	10.7382	4.51515	25	4	0.00113231	1.13231	639.11	NPL
24	NPL		10.2	5	11.1111	4.5	25	4	0.00115706	1.15706	655.669	NPL

## Sheet: Moisture
		Moisture Phosphate Exp
		MOIST SOIL	DRY SOIL	moisture	SOIL MOISTURE PERCENTAGE	gravitational avg	dry soil in 1 gm soil	dry in 10 gm (NO3)	dry soil in 5 gm
control		5	4.22297	0.777027	15.5405	0.184	0.844595	8.44595	4.22297
control		5	4.23012	0.769882	15.3976	0.182	0.846024	8.46024	4.23012
Control		5	4.31406	0.685936	13.7187	0.159	0.862813	8.62813	4.31406
N		5	4.31034	0.689655	13.7931	0.16	0.862069	8.62069	4.31034
N		5	4.3592	0.640802	12.816	0.147	0.87184	8.7184	4.3592
N		5	4.3554	0.644599	12.892	0.148	0.87108	8.7108	4.3554
P		5	4.32152	0.678479	13.5696	0.157	0.864304	8.64304	4.32152
P		5	4.4287	0.571302	11.426	0.129	0.88574	8.8574	4.4287
P		5	4.4405	0.559503	11.1901	0.126	0.888099	8.88099	4.4405
L		5	4.3554	0.644599	12.892	0.148	0.87108	8.7108	4.3554
L		5	4.38982	0.610184	12.2037	0.139	0.877963	8.77963	4.38982
L		5	4.3592	0.640802	12.816	0.147	0.87184	8.7184	4.3592
NL		5	4.35161	0.64839	12.9678	0.149	0.870322	8.70322	4.35161
NL		5	4.34028	0.659722	13.1944	0.152	0.868056	8.68056	4.34028
NL		5	4.28449	0.71551	14.3102	0.167	0.856898	8.56898	4.28449
PL		5	4.32152	0.678479	13.5696	0.157	0.864304	8.64304	4.32152
PL		5	4.34783	0.652174	13.0435	0.15	0.869565	8.69565	4.34783
PL		5	4.37063	0.629371	12.5874	0.144	0.874126	8.74126	4.37063
NP		5	4.39367	0.606327	12.1265	0.138	0.878735	8.78735	4.39367
NP
NP		5	4.39367	0.606327	12.1265	0.138	0.878735	8.78735	4.39367
NPL		5	4.33651	0.663487	13.2697	0.153	0.867303	8.67303	4.33651
NPL		5	4.46309	0.53691	10.7382	0.1203	0.892618	8.92618	4.46309
NPL		5	4.44444	0.555556	11.1111	0.125	0.888889	8.88889	4.44444

## Sheet: APA
Sample	Absorption @ 400nm	Conc. Of p-Nitrophenol from Std. curve (µg)	Conc. p-Nitrophenol after Subtracting Blank (µg)	PNP (µg/g Soil/ hr )	Average	SE			Working Standard Solution Conc. (µg of p-Nitrophenol)	Absorption @ 400nm
Blank	0	0.199068	-	-					1	0.123
treatment				APA activity
control	1.94933	13.0306	12.8315	6.41575	5.95607	0.229839			2	0.376
control	1.73967	11.6504	11.4514	5.72568					4	0.563333
control	1.74	11.6526	11.4536	5.72678					6	0.810667
N	2.459	16.3855	16.1864	8.09319	8.01859	0.0469444			8	0.953
N	2.44	16.2604	16.0613	8.03066					10	1.702
N	2.41	16.0629	15.8638	7.93192
P	1.397	9.39483	9.19576	4.59788	4.70869	0.0932909			Slope	0.151918
P	1.408	9.46724	9.26817	4.63408					Intercept	-0.030242
P	1.487	9.98726	9.78819	4.89409
NP	1.42	9.54623	9.34716	4.67358	4.69004	0.0164563
NP
NP	1.43	9.61205	9.41298	4.70649
L	2.74	18.2351	18.0361	9.01803	9.04327	0.0252329
L	2.74	18.2351	18.0361	9.01803
L	2.763	18.3865	18.1875	9.09373
NL	2.37	15.7996	15.6005	7.80027	7.49309	0.16383
NL	2.26	15.0755	14.8765	7.43823
NL	2.2	14.6806	14.4815	7.24076
PL	1.46	9.80953	9.61046	4.80523	4.85899	0.0427582
PL	1.467	9.85561	9.65654	4.82827
PL	1.502	10.086	9.88693	4.94346
NPL	1.43	9.61205	9.41298	4.70649	4.69991	0.0627931
NPL	1.46	9.80953	9.61046	4.80523
NPL	1.394	9.37508	9.17601	4.58801
5.95607	0.229839
8.01859	0.0469444
4.70869	0.0932909
9.04327	0.0252329
7.49309	0.16383
4.85899	0.0427582
4.69004	0.0164563
4.69991	0.0627931
0	0
0	0
0	0
0	0
0	0
0	0
0	0
0	0
0	0
0	0

## Sheet: UA
									Standard Curve Data
Sample	Absorption @ 527nm	Conc. Of p-Nitrophenol from Std. curve (µg of urea- N hydrolyzed g-1. h-1)	Conc. µg of urea -N hydrolyzed g-1. h-1)after Subtracting Blank (µg)	µg of urea- N hydrolyzed g-1. h-1)	Average	SE			Working Standard Solution Conc. (µg of urea -N hydrolyzed g-1. h-1)	Absorption @ 410nm
Blank	0	0	0	-					0	0.136	0.127	0.106
Treatment				UA activity
control	0.634	3.94795	3.94795	1.97398	2.002	0.0723742			1	0.386	0.377	0.365
control	0.687	4.27799	4.27799	2.13899					2	0.573	0.56	0.557
control	0.608	3.78605	3.78605	1.89303					4	0.817	0.81	0.805
N	0.576	3.58679	3.58679	1.79339	1.77679	0.00830274			6	0.958	0.953	0.948
N	0.568	3.53697	3.53697	1.76848					8	1.702	1.702	1.702
N	0.568	3.53697	3.53697	1.76848
P	0.928	5.77871	5.77871	2.88936	2.92568	0.026194			Slope	0.171832
P	0.935	5.8223	5.8223	2.91115					Intercept	0.160589
P	0.956	5.95307	5.95307	2.97653
NP	0.594	3.69887	3.69887	1.84944	1.84788	0.00155676
NP
NP	0.593	3.69265	3.69265	1.84632
L	0.725	4.51462	4.51462	2.25731	2.2241	0.0167025
L	0.71	4.42121	4.42121	2.21061
L	0.708	4.40876	4.40876	2.20438
NL	0.526	3.27543	3.27543	1.63772	1.67508	0.0656308
NL	0.509	3.16957	3.16957	1.58479
NL	0.579	3.60547	3.60547	1.80273
PL	0.61	3.79851	3.79851	1.89925	1.85981	0.0279255
PL	0.602	3.74869	3.74869	1.87434
PL	0.58	3.61169	3.61169	1.80585
NPL	0.581	3.61792	3.61792	1.80896	1.81934	0.00886733
NPL	0.582	3.62415	3.62415	1.81207
NPL	0.59	3.67396	3.67396	1.83698

## Sheet: DHA
									Standard Curve Data
Sample	Absorption	Conc. ( TPF g-1. h-1) from Std. curve	Blank -sample	µg of urea- N hydrolyzed g-1. h-1)	Average	SE			Working Standard Solution Conc. ( TPF g-1. h-1)	Absorption @ 410nm
Blank	0	0	0	-					0	0.00933333
Treatment				DHA activity
Control	0.62	1.43975	1.43975	0.719874	0.758577	0.0235421			1	0.930333
Control	0.69	1.6023	1.6023	0.80115					2	1.227
Control	0.65	1.50941	1.50941	0.754707					5	1.381
N	0.597	1.38634	1.38634	0.693169	0.669947	0.0119165
N	0.563	1.30738	1.30738	0.653692
N	0.571	1.32596	1.32596	0.662981
P	0.51	1.18431	1.18431	0.592154	0.621569	0.0208278			Slope	0.228143
P	0.526	1.22146	1.22146	0.610732					Intercept	0.430631
P	0.57	1.32364	1.32364	0.66182
NP	0.546	1.26791	1.26791	0.633954	0.635695	0.00174163
NP
NP	0.549	1.27487	1.27487	0.637437
L	0.721	1.67429	1.67429	0.837144	0.88707	0.0249836
L	0.784	1.82058	1.82058	0.910292
L	0.787	1.82755	1.82755	0.913775
NL	0.813	1.88793	1.88793	0.943964	0.950543	0.0040407
NL	0.818	1.89954	1.89954	0.949769
NL	0.825	1.91579	1.91579	0.957897
PL	0.565	1.31203	1.31203	0.656014	0.660271	0.00235421
PL	0.569	1.32132	1.32132	0.660659
PL	0.572	1.32828	1.32828	0.664142
NPL	0.839	1.9483	1.9483	0.974152	0.98228	0.0281149
NPL	0.808	1.87632	1.87632	0.938158
NPL	0.891	2.06906	2.06906	1.03453

## Sheet: BGA
									Standard Curve Data
Sample	Absorption @ 400nm	Conc. Of p-Nitrophenol from Std. curve (µg)	Conc. p-Nitrophenol after Subtracting Blank (µg)	PNP (µg/g Soil/ hr )	Average	SE			Working Standard Solution Conc. (µg of p-Nitrophenol)	Absorption @ 400nm
Blank	0	0.543778	-	-					1	0.126
Treatment				BGA activity
control	1.26	9.28978	8.74601	4.373	4.30359	0.0347064			2	0.216
control	1.23	9.08155	8.53777	4.26888					4	0.454
control	1.23	9.08155	8.53777	4.26888					6	0.792
N	1.42	10.4004	9.85661	4.92831	4.84732	0.0417119			8	0.898
N	1.38	10.1227	9.57896	4.78948					10	1.51
N	1.39	10.1921	9.64837	4.82419
P	1.27	9.3592	8.81542	4.40771	4.38457	0.0417119			Slope	0.144066
P	1.28	9.42861	8.88483	4.44242					Intercept	-0.0783397
P	1.24	9.15096	8.60718	4.30359
NP	1.32	9.70626	9.16248	4.58124	4.58124	0
NP
NP	1.32	9.70626	9.16248	4.58124
L	2.3	16.5087	15.9649	7.98247	8.09815	0.0612163
L	2.34	16.7864	16.2426	8.12129
L	2.36	16.9252	16.3814	8.1907
NL	2.61	18.6605	18.1167	9.05836	9.18562	0.0946946
NL	2.63	18.7993	18.2556	9.12778
NL	2.7	19.2852	18.7414	9.37072
PL	1.89	13.6628	13.119	6.5595	7.04539	0.242945
PL	2.1	15.1205	14.5767	7.28834
PL	2.1	15.1205	14.5767	7.28834
NPL	2.8	19.9793	19.4356	9.71778	9.81034	0.0462752
NPL	2.84	20.257	19.7132	9.85661
NPL	2.84	20.257	19.7132	9.85661
4.30359	0.0347064
4.84732	0.0417119
4.38457	0.0417119
8.09815	0.0612163
9.18562	0.0946946
7.04539	0.242945
4.58124	0
9.81034	0.0462752
0	0
0	0
0	0
0	0
0	0
0	0
0	0
0	0
0	0
0	0
